# Supplementary material
Source: Research Square preprint supplement (doi:10.21203/rs.3.rs-9274302/v1)
Supplement: Supplementary file 1 [file 962e44840836c2fa5bb40e18.xlsx]

## Sheet: STable1
Supplementary Table 1. Base Corrections Identified by Homopolish in the HK2025
Gene	Before Homopolish		After Homopolish
	Position	Base	Position	Base
ND4L	526	.	527	T
12S	976	.	978	T
ND1	1785	.	1788	T
16S	3689	.	3693	T
16S	3777	.	3782	T
16S	3777	.	3783	T
16S	3938	.	3945	T
ND3	4665	.	4673	T
ND5	5504	.	5513	T
ND5	5504	.	5514	T
ND5	6780	.	6791	T
ND5	6780	.	6792	T
ND5	6780	.	6793	T
ND5	6831	.	6845	T
tRNA-Ser1	6933	T	6946	.
ND2	7352	.	7366	T
Non-coding region	7831	.	7846	T
Non-coding region	7831	.	7847	T
ND4	8010	.	8027	T
ND4	8139	.	8157	T
ND4	8348	.	8367	T
Non-coding region	10774	T	10792	.
ND6	11142	.	11161	T
tRNA-Arg	11340	A	11358	.
Non-coding region	11406	.	11425	T
Non-coding region	11406	.	11426	T
Non-coding region	11406	.	11427	T
Non-coding region	11406	.	11428	T
Non-coding region	13448	.	13471	T
Non-coding region	13448	.	13472	T

## Sheet: STable2
Supplementary Table 2. The comparison between PX108868 and KX265050
Gene	KX265050		PX108868
	Position	Base	Position	Base
ND2	390	G	390	A
ND2	663	A	663	G
ND4	1173	G	1173	A
ND4	1302	G	1302	A
ND4	1320	A	1320	G
ND4	1989	T	1989	G
ND4	2091	C	2091	T
ND4	2193	G	2193	A
COX1	3511	G	3511	A
ND6	4330	T	4330	C
ND6	4341	T	4341	C
Non-coding region	4550	T	4549	.
Non-coding region	4551	T	4549	.
Non-coding region	4552	T	4549	.
CYTB	5172	G	5169	A
COX3	5984	T	5981	C
COX3	6601	T	6598	C
ND1	8141	G	8138	A
ND1	8312	C	8309	T
COX2	10260	A	10257	G
ND5	12514	C	12511	T
ND5	13442	C	13439	T

## Sheet: STable3
Supplementary Table 3. The comparison between PX108868 and PQ131197
Gene	PQ131197		PX108868
	Position	Base	Position	Base
tRNA-Ser	68	T	67	.
Non-coding region	956	.	956	G
Non-coding region	956	.	957	T
Non-coding region	956	.	958	T
Non-coding region	956	.	959	T
ND2	957	A	960	T
Non-coding region	3911	T	3913	.
tRNA-Arg	4478	A	4479	.
Non-coding region	4549	T	4549	.
Non-coding region	4550	T	4549	.
Non-coding region	4551	T	4549	.
COX3	5983	T	5981	C
Non-coding region	6593	.	6592	T
Non-coding region	6593	.	6593	T
Non-coding region	6598	T	6598	C
ND4L	7324	.	7325	T
12S	7774	.	7776	T
COX2	9892	T	9894	C
16S	10488	.	10491	T
16S	10577	.	10581	T
16S	11100	T	11103	.

## Sheet: STable4
Supplementary Table 4. The comparison between PX108868 and MH823370
Gene	MH823370		PX108868
	Position	Base	Position	Base
ND2	140	G	140	A
ND2	149	T	149	C
ND2	203	C	203	T
ND2	269	T	269	C
ND2	275	C	275	T
ND2	281	G	281	A
ND2	305	C	305	T
ND2	344	A	344	G
ND2	390	G	390	A
ND2	425	G	425	A
ND2	449	T	449	C
ND2	455	A	455	G
ND2	507	A	507	G
ND2	541	G	541	A
ND2	663	A	663	G
ND2	720	G	720	A
ND2	737	T	737	G
ND2	752	T	752	C
ND2	762	G	762	A
ND2	767	A	767	G
ND2	779	A	779	G
ND2	806	T	806	C
ND2	830	A	830	C
ND2	839	C	839	T
ND2	845	G	845	A
ND2	855	T	855	C
ND2	857	T	857	G
ND2	920	G	920	A
ND2	932	C	932	T
Non-coding region	966	.	967	T
Non-coding region	966	.	968	T
ND4	1127	G	1129	A
ND4	1183	T	1185	C
ND4	1223	G	1225	A
ND4	1294	G	1296	A
ND4	1295	T	1297	G
ND4	1297	A	1299	G
ND4	1318	A	1320	G
ND4	1333	A	1335	G
ND4	1453	C	1455	T
ND4	1510	A	1512	G
ND4	1525	G	1527	A
ND4	1558	G	1560	A
ND4	1570	C	1572	T
ND4	1579	G	1581	A
ND4	1601	G	1603	A
ND4	1612	T	1614	C
ND4	1627	G	1629	A
ND4	1678	T	1680	C
ND4	1687	G	1689	A
ND4	1711	G	1713	A
ND4	1780	T	1782	C
ND4	1801	G	1803	A
ND4	1810	A	1812	G
ND4	1900	G	1902	A
ND4	1966	G	1968	A
ND4	2020	T	2022	C
ND4	2038	G	2040	A
ND4	2066	G	2068	A
ND4	2086	A	2088	G
ND4	2126	G	2128	A
ND4	2159	A	2161	G
ND4	2166	A	2168	G
ND4	2191	G	2193	A
ND4	2194	T	2196	C
ND4	2218	G	2220	A
ND4	2251	A	2253	G
COX1	2286	A	2288	G
COX1	2369	G	2371	A
COX1	2444	G	2446	T
COX1	2450	T	2452	A
COX1	2498	G	2500	T
COX1	2504	A	2506	G
COX1	2534	G	2536	A
COX1	2537	G	2539	A
COX1	2600	G	2602	A
COX1	2786	A	2788	T
COX1	2858	A	2860	G
COX1	2873	A	2875	G
COX1	2894	A	2896	G
COX1	2963	T	2965	G
COX1	2984	G	2986	A
COX1	2990	A	2992	G
COX1	3065	G	3067	A
COX1	3071	A	3073	G
COX1	3131	C	3133	T
COX1	3167	T	3169	C
COX1	3218	G	3220	A
COX1	3389	A	3391	G
COX1	3473	A	3475	G
COX1	3509	T	3511	A
COX1	3512	A	3514	G
COX1	3572	G	3574	A
COX1	3587	G	3589	A
COX1	3596	A	3598	G
COX1	3638	C	3640	T
COX1	3761	T	3763	C
COX1	3776	T	3778	C
COX1	3809	A	3811	G
COX1	3815	A	3817	T
COX1	3860	G	3862	A
COX1	3899	T	3901	A
Non-coding region	3905	.	3908	T
ND6	4058	A	4061	G
ND6	4079	A	4082	G
ND6	4124	A	4127	G
ND6	4244	T	4247	C
ND6	4250	T	4253	C
ND6	4255	A	4257	.
ND6	4256	T	4257	.
ND6	4257	T	4257	.
ND6	4279	.	4280	T
ND6	4279	.	4281	T
ND6	4279	.	4282	T
ND6	4364	C	4367	T
ND6	4433	T	4436	A
ND6	4472	A	4475	G
tRNA-Arg	4527	.	4531	T
Non-coding region	4527	.	4532	C
Non-coding region	4527	.	4533	T
Non-coding region	4527	.	4534	T
Non-coding region	4527	.	4535	T
Non-coding region	4527	.	4536	T
Non-coding region	4527	.	4537	T
Non-coding region	4527	.	4538	T
Non-coding region	4527	.	4539	T
Non-coding region	4527	.	4540	T
Non-coding region	4527	.	4541	T
Non-coding region	4527	.	4542	T
Non-coding region	4527	.	4543	T
Non-coding region	4527	.	4544	T
Non-coding region	4527	.	4545	T
CYTB	4611	A	4629	G
CYTB	4638	A	4656	G
CYTB	4647	A	4665	G
CYTB	4672	A	4690	G
CYTB	4695	G	4713	A
CYTB	4710	A	4728	G
CYTB	4722	T	4740	C
CYTB	4884	G	4902	A
CYTB	5031	A	5049	G
CYTB	5151	G	5169	A
CYTB	5248	T	5266	C
CYTB	5298	A	5316	G
CYTB	5328	T	5346	C
CYTB	5349	T	5367	C
CYTB	5512	A	5530	G
CYTB	5529	G	5547	A
CYTB	5541	G	5559	A
CYTB	5646	C	5664	T
CYTB	5652	G	5670	A
CYTB	5661	A	5679	G
COX3	5770	G	5788	A
COX3	5843	A	5861	G
COX3	5868	G	5886	A
COX3	5903	A	5921	G
COX3	5963	T	5981	C
COX3	5978	A	5996	G
COX3	5984	A	6002	G
COX3	6041	G	6059	A
COX3	6050	G	6068	A
COX3	6086	C	6104	T
COX3	6176	G	6194	A
COX3	6197	C	6215	T
COX3	6212	G	6230	A
COX3	6215	T	6233	C
COX3	6225	A	6243	G
COX3	6265	A	6283	G
COX3	6306	A	6324	G
COX3	6392	G	6410	A
COX3	6415	T	6433	C
COX3	6416	T	6434	G
COX3	6434	T	6452	C
COX3	6437	C	6455	T
Non-coding region	6513	A	6531	G
Non-coding region	6565	.	6584	T
Non-coding region	6566	C	6585	T
Non-coding region	6579	T	6598	C
Non-coding region	6592	A	6610	.
Non-coding region	6597	G	6615	A
Non-coding region	6605	T	6623	C
Non-coding region	6648	G	6666	A
Non-coding region	6649	C	6667	T
Non-coding region	6664	.	6683	A
Non-coding region	6679	G	6698	A
Non-coding region	6680	C	6699	T
Non-coding region	6727	A	6746	G
Non-coding region	6737	T	6755	.
Non-coding region	6738	G	6755	.
Non-coding region	6754	C	6771	T
Non-coding region	6761	A	6778	G
Non-coding region	6764	C	6781	T
Non-coding region	6765	C	6782	T
Non-coding region	6766	A	6783	G
Non-coding region	6770	G	6787	T
Non-coding region	6772	T	6789	C
Non-coding region	6838	T	6854	.
Non-coding region	6839	T	6854	.
Non-coding region	6842	A	6857	G
tRNA-Leu	6915	.	6931	T
tRNA-Asn	6947	A	6963	G
tRNA-Lys	7045	C	7061	T
ND4L	7116	T	7132	C
ND4L	7125	G	7141	A
ND4L	7155	G	7171	A
ND4L	7198	G	7214	A
ND4L	7242	A	7258	G
ND4L	7251	A	7267	G
ND4L	7293	G	7309	A
12S	7410	A	7426	G
12S	7422	G	7438	A
12S	7473	T	7489	C
12S	7480	.	7497	T
12S	7480	.	7498	T
12S	7693	G	7711	A
12S	7757	.	7776	T
12S	7984	.	8004	T
12S	7984	.	8005	T
12S	7984	.	8006	T
12S	7984	.	8007	T
12S	7984	.	8008	T
12S	7986	A	8010	T
12S	7987	G	8011	A
tRNA-Tyr	8033	.	8058	T
tRNA-Tyr	8033	.	8059	T
ND1	8100	C	8126	T
ND1	8106	G	8132	A
ND1	8112	G	8138	A
ND1	8124	T	8150	C
ND1	8178	T	8204	A
ND1	8196	C	8222	T
ND1	8214	G	8240	A
ND1	8223	G	8249	A
ND1	8274	A	8300	G
ND1	8292	G	8318	A
ND1	8397	G	8423	A
ND1	8562	A	8588	G
ND1	8700	G	8726	T
ND1	8715	G	8741	A
ND1	8794	A	8820	G
ATP6	9038	A	9064	G
ATP6	9051	G	9077	A
ATP6	9090	A	9116	G
ATP6	9175	A	9201	G
ATP6	9238	G	9264	A
ATP6	9244	A	9270	G
ATP6	9292	A	9318	G
ATP6	9346	A	9372	G
ATP6	9368	G	9394	A
ATP6	9382	A	9408	G
ATP6	9544	G	9570	A
ATP6	9546	G	9572	T
Non-coding region	9628	C	9654	T
tRNA-Gly	9683	T	9709	G
COX2	9904	T	9930	A
COX2	9922	G	9948	A
COX2	9928	A	9954	G
COX2	10093	A	10119	T
COX2	10099	A	10125	T
COX2	10159	T	10185	A
COX2	10231	A	10257	G
COX2	10378	C	10404	T
16S	10638	T	10664	C
16S	10714	A	10740	T
16S	10722	A	10748	G
16S	10775	T	10801	A
16S	10997	T	11023	C
16S	11171	T	11197	C
16S	11400	T	11426	C
16S	11408	T	11433	.
ND3	11429	A	11454	G
ND3	11431	G	11456	T
ND3	11500	G	11525	A
ND3	11510	A	11535	G
ND3	11518	A	11543	G
ND3	11623	G	11648	A
ND3	11644	A	11669	G
ND3	11648	C	11673	T
ND3	11719	A	11744	G
ND3	11738	G	11763	A
ND3	11743	A	11768	G
tRNA-Pro	11924	G	11949	A
Non-coding region	11978	.	12004	T
tRNA-Asp	11980	A	12006	G
tRNA-Val	11992	A	12018	G
ND5	12050	A	12076	G
ND5	12066	G	12092	A
ND5	12093	C	12119	T
ND5	12133	A	12159	G
ND5	12162	A	12188	G
ND5	12236	T	12262	C
ND5	12428	G	12454	A
ND5	12545	G	12571	A
ND5	12599	T	12625	C
ND5	12647	G	12673	A
ND5	12712	T	12738	G
ND5	12715	G	12741	A
ND5	12791	G	12817	A
ND5	12959	A	12985	G
ND5	13097	G	13123	A
ND5	13223	T	13249	C
ND5	13229	T	13255	A
ND5	13325	T	13351	C
ND5	13331	G	13357	A
ND5	13418	A	13444	G
ND5	13481	T	13507	G
ND5	13632	T	13658	C
ND5	13634	G	13660	A
